1 **Nicotianamine synthase 2 is required for symbiotic nitrogen fixation in *Medicago***  
2 ***truncatula* nodules**

3 Viviana Escudero<sup>1</sup>, Isidro Abreu<sup>1</sup>, Eric del Sastre<sup>1</sup>, Manuel Tejada-Jiménez<sup>1</sup>, Camile  
4 Larue<sup>2</sup>, Lorena Novoa-Aponte<sup>3</sup>, Jiangqi Wen<sup>4</sup>, Kirankumar S. Mysore<sup>4</sup>, Javier Abadía<sup>5</sup>,  
5 José M. Argüello<sup>3</sup>, Hiram Castillo-Michel<sup>6</sup>, Ana Álvarez-Fernández<sup>5</sup>, Juan Imperial<sup>7</sup>,  
6 Manuel González-Guerrero<sup>1,8\*</sup>.

7 <sup>1</sup> Centro de Biotecnología y Genómica de Plantas (UPM-INIA), Universidad Politécnica  
8 de Madrid, 28223 Pozuelo de Alarcón (Madrid), Spain.

9 <sup>2</sup> EcoLab, Université de Toulouse, CNRS, Toulouse, France

10 <sup>3</sup> Worcester Polytechnic Institute. Worcester MA01609, USA.

11 <sup>4</sup> Noble Research Institute, Ardmore, OK73401, USA.

12 <sup>5</sup> Estación Experimental de Aula Dei, Consejo Superior de Investigaciones Científicas,  
13 50059 Zaragoza, Spain.

14 <sup>6</sup> ID21 Beamline. European Synchrotron Radiation Facility, Grenoble 38043, France.

15 <sup>7</sup> Instituto de Ciencias Agrarias, Consejo Superior de Investigaciones Científicas, 28006  
16 Madrid, Spain.

17 <sup>8</sup> Escuela Técnica Superior de Ingeniería Agronómica, Alimentaria y de Biosistemas,  
18 Universidad Politécnica de Madrid, 28040 Madrid, Spain.

19 \* Corresponding author: [manuel.gonzalez@upm.es](mailto:manuel.gonzalez@upm.es)

20

21 **Running Head:** Medicago NAS2 in symbiotic nitrogen fixation

22

23 **Keywords:** iron, metal homeostasis, legume, NAS

24

25

26

27

28

## 29 SUMMARY

30 Symbiotic nitrogen fixation carried out by the interaction between legumes and  
31 diazotrophic bacteria known as rhizobia requires of relatively large levels of transition  
32 metals. These elements act as cofactors of many key enzymes involved in this process.  
33 Metallic micronutrients are obtained from soil by the roots and directed to sink organs by  
34 the vasculature, in a process participated by a number of metal transporters and small  
35 organic molecules that mediate metal delivery in the plant fluids. Among the later,  
36 nicotianamine is one of the most important. Synthesized by nicotianamine synthases  
37 (NAS), this non-proteinogenic amino acid forms metal complexes participating in  
38 intracellular metal homeostasis and long-distance metal trafficking. Here we  
39 characterized the *NAS2* gene from model legume *Medicago truncatula*. MtNAS2 is  
40 located in the root vasculature and in all nodule tissues in the infection and fixation zones.  
41 Symbiotic nitrogen fixation requires of *MtNAS2* function, as indicated by the loss of  
42 nitrogenase activity in the insertional mutant *nas2-1*, a phenotype reverted by  
43 reintroduction of a wild-type copy of *MtNAS2*. This would be the result of the altered iron  
44 distribution in *nas2-1* nodules, as indicated by X-ray fluorescence studies. Moreover, iron  
45 speciation is also affected in these nodules. These data suggest a role of nicotianamine in  
46 iron delivery for symbiotic nitrogen fixation.

47

48 **Significance Statement:** Nicotianamine synthesis mediated by MtNAS2 is important for  
49 iron allocation for symbiotic nitrogen fixation by rhizobia in *Medicago truncatula* root  
50 nodules.

51

52

53

54

55

56

57

58

## 59 INTRODUCTION

60 Nitrogen is one of the main limiting nutrients in the biosphere, in spite of N<sub>2</sub>  
61 abundance (Smil, 1999, Hoffman *et al.*, 2014). Nitrogenase is the only enzyme that can  
62 convert, fix, N<sub>2</sub> into NH<sub>3</sub> under physiological conditions, in an energy consuming process  
63 (Burk, 1934, Burgess and Lowe, 1996). This enzyme is only expressed by the small group  
64 of diazotrophic archaea and bacteria, some of them participating in symbiosis with other  
65 organisms (Boyd and Peters, 2013). Arguably, one of the best characterized symbiosis  
66 with diazotrophic bacteria is the one established between rhizobia and legumes (Brewin,  
67 1991, Downie, 2014). This symbiosis is the basis for legume use in crop rotation  
68 strategies and their potential as an alternative to polluting and expensive synthetic  
69 nitrogen fertilizers (Johnson and Mohler, 2009, Mus *et al.*, 2016).

70 Symbiotic nitrogen fixation by the legume-rhizobia system is carried out in root  
71 nodules (Downie, 2014). These are differentiated organs that develop after a complex  
72 exchange of chemical signals between the symbionts (Oldroyd, 2013). Detection of the  
73 nodulation factors released by the rhizobia, triggers cell proliferation in the pericycle-inner  
74 cortex of the root to originate nodule primordia (Xiao *et al.*, 2014). As nodules grow,  
75 rhizobia from the root surface are directed by infection threads to the nodule cells (Gage,  
76 2002). There, they are released in an endocytic-like process, originating pseudo-  
77 organelles known as symbiosomes (Roth and Stacey, 1989, Catalano *et al.*, 2006). Within  
78 the symbiosomes, rhizobia differentiate into bacteroids and express the enzymatic  
79 machinery required for nitrogen fixation (Kondorosi *et al.*, 2013). Nodule development  
80 follows either an indeterminate or a determinate growth pattern, based on whether they  
81 maintain an apical meristem to sustain growth (Vasse *et al.*, 1990). As this meristem  
82 allows for sustained growth in indeterminate nodules, four developmental zones appear:  
83 the meristematic region or Zone I; the infection-differentiation zone or Zone II, where  
84 rhizobia are released in the cell and start differentiating; the fixation zone or Zone III,  
85 where nitrogenase is active; and the senescent zone or Zone IV, where symbiosomes are  
86 degraded and nutrients recycled (Burton *et al.*, 1998). In addition, some authors define a  
87 transition interzone between Zones II and III (Roux *et al.*, 2014).

88 Nutrient exchange between the symbionts enables nitrogen fixation (Udvardi and  
89 Poole, 2013). Availability of fixed nitrogen forms in soils inhibits nodulation (Streeter,  
90 1987). Similarly, low levels of photosynthates, phosphate or sulphate transfer from the  
91 host plant decrease nodulation and nitrogen fixation rates (Singleton and van Kessel,

92 1987, Valentine *et al.*, 2017, Schneider *et al.*, 2019). Transition metals such as iron,  
93 copper, zinc, or molybdenum are also critical for nodulation and nitrogen fixation as  
94 cofactors in many of the involved enzymes (González-Guerrero *et al.*, 2014, González-  
95 Guerrero *et al.*, 2016). This includes not only nitrogenase (Rubio and Ludden, 2005), but  
96 also NADPH-oxidases that participate in nodule signalling (Montiel *et al.*, 2016),  
97 leghemoglobin that maintains nodule O<sub>2</sub> homeostasis (Appleby, 1984), high-affinity  
98 cytochrome oxidases providing energy to the bacteroids (Preisig *et al.*, 1996), as well as  
99 many enzymes involved in free radical control (Dalton *et al.*, 1998, Santos *et al.*, 2000,  
100 Rubio *et al.*, 2007). Consequently, deficiencies in the uptake of these nutrients or  
101 alterations in the metal delivery pathways lead to defects in nodulation and/or nitrogen  
102 fixation (Tang *et al.*, 1991, O'Hara, 2001, Senovilla *et al.*, 2018, Gil-Díez *et al.*, 2019).

103 To reach the bacteroids, metals must first cross from soil into the roots using the  
104 general mechanisms common to all dicots (Kobayashi and Nishizawa, 2012, Curie and  
105 Mari, 2017). Metal uptake is facilitated by soil acidification, the release of  
106 phenolics/coumarins and flavins, and cation reduction when required (Jain *et al.*, 2014).  
107 Metals are then introduced into the root epidermis and symplastically or apoplastically  
108 reach the root endodermis, to cross into the vasculature, and delivered to sink organs. In  
109 model legume *Medicago truncatula* metals are released from the vessels into the apoplast  
110 of the infection-differentiation zone of nodules (Rodríguez-Haas *et al.*, 2013). These  
111 nutrients will be introduced in rhizobia-infected cells and targeted to symbiosomes for  
112 nitrogen fixation. In recent years, many of the membrane transporters participating in  
113 metal transfer from the plant to the bacteroids have been identified. For instance, iron  
114 transfer to nitrogen-fixing cells is facilitated by plasma membrane iron uptake protein  
115 MtNramp1 (Tejada-Jiménez *et al.*, 2015), and its transport across the symbiosome  
116 membrane by MtSEN1 and MtFPN2 (Hakoyama *et al.*, 2012, Escudero *et al.*, 2019).  
117 However, little is known on how metals are sorted intracellularly and on the speciation  
118 of these elements.

119 Unlike alkali or alkali-earth elements, transition metals are not “free”, hydrated,  
120 in physiological solutions. Instead, they are bound to a plethora of organic molecules that  
121 maintain them soluble under different pH, prevent metal-catalysed production of free  
122 radicals in Fenton-style reactions, and avoid mis-metallation of enzymes (Finney and  
123 Halloran, 2003, Rellán-Álvarez *et al.*, 2008, Flis *et al.*, 2016). Systematic studies of the  
124 nature of these chemical species in the sap of model plants have revealed the importance

125 of citrate and nicotianamine in this role (von Wiren *et al.*, 1999, Durrett *et al.*, 2007,  
126 Roschzttardtz *et al.*, 2011, Schuler *et al.*, 2012). Citrate is the main iron chelator in xylem  
127 and facilitates iron delivery across symplastically disconnected tissues (Durrett *et al.*,  
128 2007, Rellán-Álvarez *et al.*, 2010, Roschzttardtz *et al.*, 2011). It has also been associated  
129 with iron trafficking to nodules (LeVier *et al.*, 1996). Citrate efflux proteins LjMATE1  
130 and MtMATE67 are required for iron allocation to nodules and contribute to nitrogen  
131 fixation (Takanashi *et al.*, 2013, Kryvoruchko *et al.*, 2018). Citrate efflux is also  
132 important for iron delivery to bacteroids, as indicated by the symbiosome localization of  
133 nodule-specific protein MtMATE67 (Kryvoruchko *et al.*, 2018).

134 Nicotianamine is also an important player in plant metal homeostasis. This  
135 molecule is a non-proteinogenic amino acid synthesized by nicotianamine synthases  
136 (NAS) from S-adenosyl methionine (Higuchi *et al.*, 1999). Nicotianamine-metal  
137 complexes mediate long-distance metal trafficking, particularly along the phloem, as well  
138 as participate in vacuolar metal storage (von Wiren *et al.*, 1999, Haydon *et al.*, 2012, Flis  
139 *et al.*, 2016). A nodule-specific NAS gene was identified in senescent nodules of *L.*  
140 *japonicus*, likely participating in the metal redistribution to the developing flowers and  
141 embryos, as orthologues do with older leaves (Hakoyama *et al.*, 2009, Schuler *et al.*,  
142 2012). No such nodule-specific NAS gene can be found in transcriptomic databases from  
143 indeterminate type nodules, but tentative evidence shows that a *M. truncatula* NAS  
144 protein, MtNAS1, might be responsible for iron allocation to these organs (Avenhaus *et*  
145 *al.*, 2016). Here, we have characterized a second NAS protein, MtNAS2, identified in a  
146 screening of *M. truncatula Tnt1*-insertion mutants. This gene, although primarily  
147 expressed in roots, is important for metal allocation for symbiotic nitrogen fixation.

148

## 149 RESULTS

### 150 *Medicago truncatula Tnt1* line NF15101 phenotype is due to transposon insertion in 151 *MtNAS2*

152 A search for metal-related symbiotic phenotypes of the mutants available at the  
153 Noble Research Institute *M. truncatula* Mutant Database showed NF15101 as one of the  
154 available mutants with a nitrogen fixation deficient phenotype. This line has 22 *Tnt1*  
155 insertions, 10 of which interrupted different *M. truncatula* genes (Supp. Table 1),  
156 *Medtr2g070310* among them. This gene encodes a protein with 52 % identity and 67 %

157 similarity to *Arabidopsis thaliana* NAS2 protein, and consequently was renamed  
158 *MtNAS2*. *MtNAS2* was expressed at similar levels in roots from plants inoculated or non-  
159 inoculated with *Sinorhizobium meliloti* (Fig. 1A). Significantly, lower expression was  
160 detected in nodules, and no signal was detected in shoots from either inoculated or non-  
161 inoculated plants. *Tnt1* was inserted in position +760 of *MtNAS2*, interrupting the reading  
162 frame of its only exon and diminishing *MtNAS2* mRNA levels below our detection limit  
163 (Fig. 1B). As expected, NF15101, *nas2-1* in this report, had reduced biomass production  
164 in nitrogen fixation conditions (Fig. 2A, B). While nodule development and nodule  
165 number were not significantly altered in *nas2-1* compared to wild type (Fig. 2C, D, Supp.  
166 Fig. 1), nitrogenase activity was reduced three-fold in *nas2-1* plants (Fig. 2E). No  
167 significant differences in nicotianamine content were observed between wild-type and  
168 mutant plants (Supp. Fig. 2). The *nas2-1* phenotype was reverted when a wild-type copy  
169 of *MtNAS2* regulated by its own promoter was reintroduced in *nas2-1* (Fig. 2). The data  
170 indicate that among all the *Tnt1* insertions, loss of *MtNAS2* function was determinant for  
171 the reduction of nitrogenase activity and overall growth alterations.

172

### 173 ***MtNAS2* is not required for plant growth under non-symbiotic conditions**

174 To determine whether the symbiotic phenotype of *nas2-1* was the result of  
175 additional physiological processes being affected, these plants and their controls were  
176 grown in the same conditions as above, but supplemented with ammonium nitrate in the  
177 nutrient solution to compensate for the lack of rhizobial inoculation. In these conditions,  
178 no significant differences were found in plant growth, biomass production, or chlorophyll  
179 content between wild-type and *nas2-1* plants (Fig. 3). Considering the role of  
180 nicotianamine in plant iron homeostasis (von Wiren *et al.*, 1999, Inoue *et al.*, 2003) and  
181 the added pressure of symbiotic nitrogen fixation on iron nutrition (Terry *et al.*, 1991),  
182 *nas2-1* phenotype was also studied under non-symbiotic, low-iron conditions (no iron  
183 added to the nutrient solution). Low-iron supply did not lead to different growth between  
184 control and *nas2-1* plants (Supp. Fig. 3).

185

### 186 ***MtNAS2* is expressed in the xylem parenchyma in roots and in the nodule fixation** 187 **zone**

188           The physiological role of *MtNAS2* is determined by its differential tissue and  
189 cellular expression. To establish the gene tissue expression, *M. truncatula* plants were  
190 transformed with a binary vector containing the *MtNAS2* promoter region driving the  $\beta$ -  
191 *glucuronidase* (*gus*) gene transcription and GUS activity visualized using X-Gluc.  
192 *MtNAS2* was expressed in roots and nodules (Fig. 4A), in agreement with the transcript  
193 data (Fig. 1). Longitudinal section of the nodules showed GUS activity in cells in the  
194 interzone and fixation zone of the nodule (Fig. 4B). Nodule cross-sections showed  
195 expression in all nodule tissues (Fig. 4C). In roots, *MtNAS2* promoter was active in  
196 vasculature cells (Fig. 4D).

197           Supporting the gene expression results, immunolocalization of HA-tagged  
198 MtNAS2 under control of its own promoter showed that the protein was located in cells  
199 neighbouring the interzone and fixation zone (Fig. 5A). At higher magnification, we  
200 could observe that MtNAS2-HA had a homogenous distribution within the cells, and it  
201 did not seem to cluster in any particular location (Fig. 5B). Analysis of nodule vasculature  
202 showed MtNAS2-HA in endodermal cells (Fig. 5C). However, in the root vasculature,  
203 MtNAS2-HA was detected in small cells associated to the xylem, (Fig. 5D). Controls  
204 were carried out to ensure that the data did not stem from autofluorescence (Supp. Fig 4).

205

## 206 ***MtNAS2* is required for efficient metal allocation for symbiotic nitrogen fixation**

207           Nicotianamine is required for metal allocation from source to sink tissues (Schuler  
208 *et al.*, 2012). Alterations in nicotianamine synthesis typically lead to reduced metal  
209 delivery to sink tissues. To determine whether this was the case for *nas2-1*, iron, copper  
210 and zinc levels in roots, shoots, and nodules from 28 days-post-inoculation (dpi) plants  
211 were determined. No significant changes in these levels were observed (Fig. 6A).  
212 However, metal allocation might be altered while not affecting total nodule metal content.  
213 To assess this possibility, synchrotron-based X-ray fluorescence studies were carried out  
214 to determine iron distribution in *nas2-1* compared to wild type (Fig. 6B). These  
215 experiments showed that iron distribution was altered in *nas2-1* mutants. To further  
216 confirm that mutation of *MtNAS2* affected iron distribution in nodules as a consequence  
217 of changes of iron speciation, X-ray Absorption Near-Edge Spectroscopy (XANES)  
218 analyses of iron speciation in the different nodule developmental zones were carried out  
219 (Fig. 6C). Principal component analyses of these spectra showed that the iron complexes

220 in the fixation zone were quite different (Fig. 6D). Fitting of the obtained spectra to  
221 known standards showed that the proportion of Fe-S complexes had a dramatic drop in  
222 *nas2-1* compared to wild-type plants, while the proportion of O/N complexes with iron  
223 had a larger increase (Table 1).

224

## 225 **DISCUSSION**

226 Metallic micronutrient delivery to nodules is essential for symbiotic nitrogen  
227 fixation, as they are cofactors in many of the involved enzymes (Brear *et al.*, 2013,  
228 González-Guerrero *et al.*, 2014). In recent years, studies have shown how metals are  
229 exported to the apoplast in the infection/differentiation zone of *M. truncatula* nodules  
230 (Rodríguez-Haas *et al.*, 2013), and transmembrane transporters introduce metals into  
231 rhizobia-infected cells (Tejada-Jiménez *et al.*, 2015, Abreu *et al.*, 2017, Tejada-Jiménez  
232 *et al.*, 2017, Senovilla *et al.*, 2018), or deliver iron to the bacteroids (Escudero *et al.*,  
233 2019). In this transport, citrate participates in maintaining iron solubility in the apoplast,  
234 and as the preferred iron source for bacteroids (Moreau *et al.*, 1995, LeVier *et al.*, 1996,  
235 Kryvoruchko *et al.*, 2018). Here we show that nicotianamine synthesis is also important  
236 for correct iron allocation to *M. truncatula* nodules.

237 Interrupting *MtNAS2* expression with a transposon insertion led to reduced plant  
238 growth in symbiotic conditions, a consequence of lower nitrogenase activity. Although  
239 several genes were affected in the studied *Tnt1* line, reintroduction of a wild-type copy  
240 of *MtNAS2* was sufficient to restore wild-type growth. Consequently, the mutation of this  
241 gene was mainly responsible for the observed phenotype. While important under  
242 symbiotic conditions, *MtNAS2* seemed to be playing a secondary role when plants were  
243 not inoculated but watered with an ammonium nitrate-supplemented nutrient solution  
244 instead. This is in contrast to the substantially higher expression levels of *MtNAS2* in roots  
245 than in nodules. This observation would suggest a predominant role in nicotianamine  
246 synthesis in roots. However, studies in *A. thaliana* reveal the existence of a high  
247 redundancy rate in the NAS family, where a quadruple *nas* mutant was required to  
248 observe a substantial phenotype, including limited growth (Klatte *et al.*, 2009). Similarly,  
249 no significant changes in nicotianamine content were observed in single *nas A. thaliana*  
250 lines, as neither was observed in *M. truncatula nas2-1*. Two possible causes might explain  
251 the symbiosis-specific phenotype of *nas2-1* plants. One of them is that *MtNAS2* would  
252 be required to compensate for the enhanced iron requirements of nodulated plants. This



253 additional nutritional pressure would trigger the observed *nas2-1* phenotype. If so, we  
254 should have also observed a similar phenotype when plants were watered with an iron-  
255 restricted nutrient solution, which has been shown in the past to elicit the iron deficiency  
256 response in *M. truncatula* (Andaluz *et al.*, 2009, Tejada-Jiménez *et al.*, 2015). However,  
257 this was not observed. Alternatively, in a more parsimonious mechanism,  
258 neofunctionalization of pre-existing genes during the development of symbiotic nitrogen  
259 fixation might have led to the loss of functional redundancy. Similar observations have  
260 been made when studying other *M. truncatula* metal homeostasis genes that, although  
261 expressed in roots and in nodules, exhibit phenotypes limited to nodulation and nitrogen  
262 fixation (Tejada-Jiménez *et al.*, 2015, Abreu *et al.*, 2017, León-Mediavilla *et al.*, 2018).

263 In roots, *MtNAS2* was expressed at high levels in xylem parenchyma cells,  
264 similarly to rice *NAS2* (Inoue *et al.*, 2003). Vascular localization of NAS proteins is not  
265 unusual, since they have been associated to long distance metal trafficking (von Wiren *et*  
266 *al.*, 1999, Kumar *et al.*, 2017). This vascular localization of *MtNAS2* was also observed  
267 in nodules. However, the cellular localization of the protein is different to what was  
268 observed in roots; in nodules, most of vascular *MtNAS2* was confined to the endodermis.  
269 This alternative distribution of *MtNAS2* in vessels could be indicative of differential  
270 functions. Root vascular localization could indicate a role in metal loading of the vascular  
271 fluids, while endodermal localization in nodules might mediate either uptake from saps  
272 or intracellular metal trafficking. In any case, it seems unlikely that the nicotianamine  
273 synthesized by nodule endodermal cells would end up in the apoplast, since citrate-iron  
274 complexes seem to be formed in this compartment at a pH that does not facilitate iron-  
275 nicotianamine association (Rellán-Álvarez *et al.*, 2008).

276 *MtNAS2* expression in nodule core cells in the interzone and zone III also indicates  
277 a role of nicotianamine in metal homeostasis of nitrogen fixing cells. It has been  
278 previously described that nicotianamine can participate in intracellular metal trafficking  
279 and in cell-to-cell metal delivery, as well as serve as intracellular storage of metals  
280 (Haydon *et al.*, 2012). Mutation of *MtNAS2* did not significantly alter iron, copper, or  
281 zinc levels in any of the plant organs analysed, but a major shift in iron distribution was  
282 observed in nodules, with a significant decrease of iron accumulation in the interzone and  
283 early fixation zone. This would indicate that iron trafficking in these cells is altered.  
284 However, *MtNAS2*-mediated iron trafficking would only affect a subset of the nodule  
285 iron-proteome, since delivery to the fixation zone was not completely blocked as attested

286 by the red colour of nodules, indicative that leghemoglobin (an important iron sink) was  
287 being produced in addition to a residual nitrogenase activity. This could suggest the  
288 existence of differential metallation pathways in nodules that might serve different  
289 subsets of proteins, which could partially complement each other under stress conditions.  
290 Supporting this hypothesis, mutation of *MtNAS2* did not equally affect all the iron species  
291 in the fixation zone. While the percentage of iron-sulfur complexes detected by XANES  
292 was significantly lower than in control plants, iron coordinated by nitrogen or oxygen  
293 atoms was increased. Considering the high demand for iron-sulfur clusters for nitrogenase  
294 assembly (Rubio and Ludden, 2005), its decrease could explain the reduction of  
295 nitrogenase activity observed. The changes in iron speciation were particularly severe in  
296 the fixation zone, which is consistent with *MtNAS2* distribution, with the observed  
297 reduction of nitrogenase activity, and with the iron distribution data. It is important to  
298 indicate that we cannot rule out similar effects on copper or zinc speciation and  
299 distribution, since the synchrotron setup available to us at the European Synchrotron  
300 Radiation Facility prevented us to carry out similar analyses on those two elements.

301 This work highlights the importance of *MtNAS2* in iron delivery for symbiotic  
302 nitrogen fixation. This is not the only NAS gene that might be involved in the process,  
303 since total nicotianamine production is sustained in nodules, and other family members  
304 have been shown to be expressed in these organs, such as *MtNAS1* (Avenhaus *et al.*,  
305 2016). The localization of *MtNAS2* indicates that nicotianamine would be involved in  
306 intracellular iron trafficking that is highly important for nitrogenase functioning. This role  
307 would not be directly providing the element to the bacteroid, since iron-citrate seems to  
308 be the key here, but perhaps would shuttle this element in the cytosol. However, to better  
309 define this possibility, new tools in elemental imaging and speciation with higher  
310 resolution within a cell need to be established to track iron and other elements. In addition,  
311 the roles of ZIF-like (Haydon *et al.*, 2012) and YSL proteins (Waters *et al.*, 2006) in  
312 symbiotic nitrogen fixation must be determined. Finally, other NAS proteins might  
313 facilitate iron recycling in *M. truncatula* nodules, as it occurs in *L. japonicus* (Hakoyama  
314 *et al.*, 2009).

315

## 316 **EXPERIMENTAL PROCEDURES**

### 317 Biological material and growth conditions

318 *M. truncatula* Gaertn R108 and *nas2-1* (NF15101) seeds were scarified in  
319 concentrated sulfuric acid (96%) for 7.5 min. After removing the acid, the seeds were  
320 washed eight times with cold water, and surface-sterilized with 50 % (v/v) bleach for 90  
321 s. Seeds were embedded overnight in the dark at room temperature in sterile water, and  
322 transferred to 0.8 % water-agar plates for 48 h at 4 °C (stratification). Germination was  
323 carried out at 22 °C in the dark. Seedlings were planted on sterile perlite pots, and  
324 inoculated with *S. meliloti* 2011 or the same bacterial strain transformed with pHc60  
325 (Cheng and Walker, 1998). Plants were grown in a greenhouse under 16 h light / 8 h dark  
326 at 25 °C / 20 °C conditions. In the case of perlite pots, plants were watered every two days  
327 with Jenner's solution or water alternatively (Brito *et al.*, 1994). Nodules were obtained  
328 at 28 dpi. Plants growing in non-symbiotic conditions were watered every two weeks with  
329 a nutrient solution supplemented with 20 mM NH<sub>4</sub>NO<sub>3</sub>. For hairy-root transformation  
330 experiments, *M. truncatula* seedlings were transformed with *Agrobacterium rhizogenes*  
331 strain ARqua1, fused to the appropriate binary vector as described (Boisson-Dernier *et*  
332 *al.*, 2001).

333

#### 334 RNA Extraction and Quantitative real-time RT-qPCR

335 RNA was extracted from 28 dpi plants using TRI-reagent (Life Technologies),  
336 treated using DNase turbo (Life Technologies), and cleaned with RNeasy Mini-kit  
337 (Qiagen). cDNA was obtained from 500 ng RNA using PrimeScript RT reagent Kit  
338 (Takara). Expression studies were carried out by real-time reverse transcription  
339 polymerase chain reaction (RT-qPCR; StepOne plus, Applied Biosystems) using the  
340 Power SyBR Green master mix (Applied Biosystems). The primers used are indicated in  
341 Supp. Table 2. RNA levels were normalized by using the ubiquitin conjugating enzyme  
342 E2 (*Medtr7g116940*) gene as internal standard. Real time cyclers conditions have been  
343 previously described (González-Guerrero *et al.*, 2010).

344

#### 345 GUS Staining

346 *MtNAS2* promoter region was obtained by amplifying the 1940 bp upstream of the  
347 start codon using the primers indicated in Supp. Table 2, and cloned by Gateway cloning  
348 technology (Invitrogen) in pDONR207 (Invitrogen) and transferred to destination vector  
349 pGWB3 (Nakagawa *et al.*, 2007). Hairy-root transformations of *M. truncatula* seedlings  
350 were carried out with *A. rhizogenes* ARqua1 as described by Boisson-Denier *et al.* (2001).  
351 After three weeks on Fahreus media plates with kanamycin (50 µg/mL), plant

352 transformants were transferred to sterilized perlite pots and inoculated with *S. meliloti*  
353 2011. GUS activity was determined in 28 dpi plants as described (Vernoud *et al.*, 1999).

354

### 355 Confocal microscopy

356 The coding sequence region of *MtNAS2* and 1940 bp upstream of its start codon  
357 were cloned in pGWB13 vector (Nakagawa *et al.*, 2007) using Gateway cloning  
358 technology (Invitrogen). This fuses three HA epitopes to C-terminus of the protein. Hairy-  
359 root *M. truncatula* transformants were transferred to sterilized perlite pots and inoculated  
360 with *S. meliloti* 2011 containing the pHc60 plasmid that constitutively expresses GFP.  
361 Nodules and roots were collected from 28 dpi plants and fixed at 4 °C overnight in 4 %  
362 para-formaldehyde and 2.5 % sucrose in phosphate-buffered saline (PBS). Fixative was  
363 removed by washing for 5 min in PBS and 5 min in water. Nodule and roots were included  
364 in 6 % agarose for sectioning with a Vibratome 1000 Plus. Sections were dehydrated by  
365 serial incubation with methanol (30 %, 50 %, 70 % and 100 % in PBS) for 5 min and then  
366 rehydrated following the same methanol series in reverse order. Cell wall  
367 permeabilization was carried out by incubation with 2 % (w/v) cellulase in PBS for 1 h  
368 and 0.1 % (v/v) Tween 20 for 15 min. Sections were blocked with 5% (w/v) bovine serum  
369 albumin in PBS and then incubated with 1:50 anti-HA mouse monoclonal antibody  
370 (Sigma) in PBS at room temperature for 2 h. Primary antibody was washed three times  
371 with PBS for 15 min and subsequently incubated with 1:40 Alexa 594-conjugated anti-  
372 mouse rabbit monoclonal antibody (Sigma) in PBS at room temperature for 1 h.  
373 Secondary antibody was washed three times with PBS for 10 min. DNA was stained  
374 using DAPI. Images were obtained with a confocal laser-scanning microscope (Leica  
375 SP8) using excitation light at 488 nm to GFP and 561 nm for Alexa 594.

376

### 377 Acetylene reduction assays

378 Nitrogenase activity assay was measured by acetylene reduction test (Hardy *et al.*,  
379 1968). Wild-type and *nas2-1* nodulated roots from 28 dpi were separately introduced in  
380 30 ml vials. Each tube contained four or five independently transformed plants. Three  
381 milliliters of air from each bottle was replaced by the same volume of acetylene, tubes  
382 were subsequently incubated for 30 min at room temperature. Gas samples were  
383 measured by analyzing 0.5 ml of ethylene from each bottle in a Shimadzu GC-8A gas  
384 chromatograph using a Porapak N column. The amount of the ethylene produced was  
385 determined by measuring the ethylene peaks relative to the standards.

386

### 387 Chlorophyll Content Assays

388 Total chlorophyll content was determined as previously described with some  
389 modifications (Inskip and Bloom, 1985). Leaves were collected from 28 dpi plants and  
390 pooled to obtain 50 mg of fresh material. Chlorophyll was extracted with 500  $\mu$ l of di-  
391 methyl-formamide at 4 °C overnight. Leaves were centrifuged for 5 min at 600 g at room  
392 temperature. After transferring the supernatant to another vial, the chlorophyll extraction  
393 was repeated with the same leave using strong vortexing. After spinning for 5 min at 600  
394 g, the supernatant was pooled with the previous one. Chlorophyll was quantified at 647  
395 nm and 664 nm in a Ultraspec 3300 spectrophotometer (Amershan Bioscience).

396

### 397 Metal content determination

398 Shoots, roots, and nodules were collected from 28 dpi plants and mineralized with  
399 15.6 M HNO<sub>3</sub> (trace metal grade) at 75°C for 3 h and 2 M H<sub>2</sub>O<sub>2</sub> at 20°C overnight. Metal  
400 quantifications were performed in duplicate by Atomic Absorption Spectroscopy, using  
401 a Perkin Elmer PinAAcle 900Z GF-AAS equipment. Metal concentration was normalized  
402 against fresh tissue weight.

403

### 404 Synchrotron Radiation X-Ray Fluorescence Spectroscopy (XRF) and XANES

405 XRF hyperspectral images and  $\mu$ XANES spectra were acquired on the beamline  
406 ID21 of the European Synchrotron Radiation Facility (Cotte *et al.*, 2017), at 110 K in the  
407 liquid nitrogen (LN2) cooled cryostat of the Scanning X-ray Micro-spectroscopy end-  
408 station. Seven sections from *M. truncatula* R108 nodules and five from *nas2-1* nodules  
409 were obtained from different nodules embedded in OCT medium and cryo-fixed by  
410 plunging in isopentane chilled with LN2. The 25  $\mu$ m-thick sections of frozen samples  
411 were obtained using a Leica LN2 cryo-microtome and accommodated in a Cu sample  
412 holder cooled with LN2, sandwiched between Ultralene (SPEX SamplePrep) foils. The  
413 beam was focused to 0.4 $\times$ 0.9  $\mu$ m<sup>2</sup> with a Kirkpatrick-Baez (KB) mirror system. The  
414 emitted fluorescence signal was detected with energy-dispersive, large area (80 mm<sup>2</sup>)  
415 SDD detector equipped with Be window (SGX from RaySpec). Images were acquired at  
416 the fixed energy of 7.2 keV, by raster-scanning the sample in the X-ray focal plane, with  
417 a step of 3 $\times$ 3  $\mu$ m<sup>2</sup> and 100 ms dwell time. Elemental mass fractions were calculated from  
418 fundamental parameters with the PyMCA software package, applying pixel-by-pixel  
419 spectral deconvolution to hyperspectral maps normalized by the incoming flux (Solé *et*

420 *al.*, 2007). The incoming flux was monitored using a drilled photodiode previously  
421 calibrated by varying the photon flux at 7.2 keV obtaining a response of 1927.9  
422 charges/photon with a linear response up to 200 kcps. In PyMCA the incoming flux and  
423 XRF detector parameters were set to  $2 \times 10^9$  photons/s, 0.7746 cm<sup>2</sup> active area, and 4.65  
424 cm sample to XRF detector distance. Sample matrix was assumed to be amorphous ice  
425 (11% H, 89% O, density 0.92 g/cm<sup>3</sup>), the sample thickness set at 25 μm obtained with the  
426 use of a cryo-microtome.

427 Fe-K edge (7.050 to 7.165 keV energy range, 0.5 eV step) μXANES spectra were  
428 recorded in regions of interest of the fluorescence maps acquired on ID21 beamline.  
429 Individual spectra were processed using Orange software with the Spectroscopy add-on  
430 (Demsar *et al.*, 2013). The pre-processing step consisted of vector normalization and a  
431 Savitsky-Golay filter for the smoothing. Then a principal component analysis was  
432 performed on the second derivative of the spectra to highlight potential differences among  
433 genotypes within a given region of the nodule. A reference library was used for linear  
434 combination fitting (LCF) procedure. This library consisted of: Fe-foil (Fe(0)), Fe(II)-  
435 nicotianamine, Fe(II)S2 (<http://ixs.iit.edu/database/>), Fe(III)-haem (50 mM, pH7, bought  
436 from Sigma, CAS number: 16009-13-5), Fe(III)-cellulose (5 mM FeCl<sub>3</sub> + 50 mM  
437 cellulose, pH 5.8, bought from Sigma, CAS number: 9004-34-6), Fe(III) glutamic acid  
438 (5 mM FeCl<sub>3</sub> + 50 mM glutamic acid, pH 7, bought from Sigma, CAS number: 56-86-  
439 0) and Fe(III) ferritin (bought from Sigma, CAS number: 9007-73-2, 50 mM,  
440 pH7). Reference compounds were classified as Fe(II)-S (FeS<sub>2</sub>), Fe(II)-O/N (Fe-NA) and  
441 Fe(III)-O (Fe-cellulose, Fe-glutamic acid and ferritin). XANES data treatment was  
442 performed using Athena software (Ravel and Newville, 2005) as previously described  
443 (Larue *et al.*, 2014).

444

#### 445 Statistical tests

446 Data were analyzed by Student's unpaired *t* test to calculate statistical significance  
447 of observed differences. Test results with *p*-values < 0.05 were considered as statistically  
448 significant.

449

#### 450 **Acknowledgments**

451 This research was funded by a European Research Council Starting Grant (ERC-2013-  
452 StG-335284) and a Ministerio de Economía y Competitividad (MINECO) grant  
453 (AGL2015-65866-P), to MGG, and a MINECO grant (AGL2016-75226-R) to JA and

454 AA-F. VE was partially funded by the Severo Ochoa Programme for Centres of  
455 Excellence in R&D from Agencia Estatal de Investigación of Spain (grant SEV-2016-  
456 0672) to CBGP. IA is recipient of a Juan de la Cierva- Formación postdoctoral  
457 fellowship from Ministerio de Ciencia, Innovación y Universidades (FJCI-2017-33222).  
458 Development of *M. truncatula Tnt1* mutant population was, in part, funded by the  
459 National Science Foundation, USA (DBI-0703285) to KSM. We would like to thank Dr.  
460 Marine Cotte and Dr Juan Herrera-Estrella for assistance in using beamline ID21 during  
461 experiments EV246 and EV323. We would also like to acknowledge the other members  
462 of laboratory 281 at Centro de Biotecnología y Genómica de Plantas (UPM-INIA) for  
463 their support and feedback in preparing this manuscript.

464

465

466

467

468

469

470

471

472

473

474

475

476

477

478

479

480

481

482

483

484

485

486

487

488 **SHORT LEGEND FOR SUPPORTING INFORMATION**

489 **Supporting Figure 1.** Anatomy of 28 dpi wild-type and *nas2-1* nodules.

490 **Supporting Figure 2.** Nicotianamine content in wild-type and *nas2-1* plants.

491 **Supporting Figure 3.** Phenotype of *nas2-1* plants under low iron conditions.

492 **Supporting Figure 4.** Control for immunolocalization assays.

493 **Supporting Table 1.** Genes affected by *Tnt1* insertion in *M. truncatula* line NF15101.

494 **Supporting Table 2.** Primers used in this study.

495 **Supporting Materials and Methods**

496

497

498

499

500

501

502

503

504

505

506

507

508

509

510

511

512

513



514 REFERENCES

- 515 **Abreu, I., Saez, A., Castro-Rodríguez, R., Escudero, V., Rodríguez-Haas, B.,**  
516 **Senovilla, M., Larue, C., Grolimund, D., Tejada-Jiménez, M., Imperial, J.**  
517 **and Gonzalez-Guerrero, M. (2017) *Medicago truncatula* Zinc-Iron Permease6**  
518 **provides zinc to rhizobia-infected nodule cells. *Plant Cell Environ.*, **40**, 2706-**  
519 **2719.**
- 520 **Andaluz, S., Rodríguez-Celma, J., Abadía, A., Abadía, J. and López-Millán, A.-F.**  
521 **(2009) Time course induction of several key enzymes in *Medicago truncatula***  
522 **roots in response to Fe deficiency. *Plant Physiol. Biochem.*, **47**, 1082-1088.**
- 523 **Appleby, C.A. (1984) Leghemoglobin and *Rhizobium* respiration. *Annu. Rev. Plant***  
524 ***Physiol.*, **35**, 443-478.**
- 525 **Avenhaus, U., Cabeza, R.A., Liese, R., Lingner, A., Dittert, K., Salinas-Riester, G.,**  
526 **Pommerenke, C. and Schulze, J. (2016) Short-term molecular acclimation**  
527 **processes of legume nodules to increased external oxygen concentration. *Front.***  
528 ***Plant Sci.*, **6**, 1012.**
- 529 **Boisson-Dernier, A., Chabaud, M., Garcia, F., Bécard, G., Rosenberg, C. and**  
530 **Barker, D.G. (2001) Agrobacterium rhizogenes-transformed roots of *Medicago***  
531 ***truncatula* for the study of nitrogen-fixing and endomycorrhizal symbiotic**  
532 **associations. *Mol. Plant Microbe Interact.*, **14**, 695-700.**
- 533 **Boyd, E.S. and Peters, J.W. (2013) New insights into the evolutionary history of**  
534 **biological nitrogen fixation. *Front. Microbiol.*, **4**, 201.**
- 535 **Brear, E.M., Day, D.A. and Smith, P.M.C. (2013) Iron: an essential micronutrient for**  
536 **the legume–rhizobium symbiosis. *Front. Plant Sci.*, **4**, 359.**
- 537 **Brewin, N.J. (1991) Development of the legume root nodule. *Annu Rev. Cell Biol.*, **7**,**  
538 **191-226.**
- 539 **Brito, B., Palacios, J.M., Hidalgo, E., Imperial, J. and Ruíz-Argüeso, T. (1994) Nickel**  
540 **availability to pea (*Pisum sativum* L.) plants limits hydrogenase activity of**  
541 ***Rhizobium leguminosarum* bv. *viciae* bacteroids by affecting the processing of the**  
542 **hydrogenase structural subunits. *J. Bacteriol.*, **176**, 5297-5303.**
- 543 **Burgess, B. and Lowe, D. (1996) Mechanism of molybdenum nitrogenase. *Chem. Rev.*,**  
544 ****96**, 2983-3011.**
- 545 **Burk, D. (1934) Azotase and nitrogenase in *Azotobacter*. *Enzymforsch*, **3**, 23-56.**
- 546 **Burton, J.W., Harlow, C. and Theil, E.C. (1998) Evidence for reutilization of nodule**  
547 **iron in soybean seed development. *J. Plant Nutr.*, **5**, 913-927.**
- 548 **Catalano, C.M., Czymbek, K.J., Gann, J.G. and Sherrier, D.J. (2006) *Medicago***  
549 ***truncatula* syntaxin SYP132 defines the symbiosome membrane and infection**  
550 **droplet membrane in root nodules. *Planta*, **225**, 541-550.**
- 551 **Cheng, H.P. and Walker, G.C. (1998) Succinoglycan is required for initiation and**  
552 **elongation of infection threads during nodulation of alfalfa by *Rhizobium meliloti*.**  
553 ***J. Bacteriol.*, **180**, 5183-5191.**
- 554 **Cotte, M.P.E., Salomé, M., Rivard, C., Nolf, W.D., Castillo-Michel, H., Fabris, T.,**  
555 **Monico, L., Janssens, K., Wang, T., Sciau, P., Verger, L., Cormier, L.,**  
556 **Dargaud, O., Brun, E., Bugnazet, D., Fayard, B., Hesse, B., del Real, A.E.P.,**  
557 **Veronesi, G., Langlois, J., Balcar, N., Vandenberghe, Y., Solé, V.A., Kieffer,**  
558 **J., Barrett, R., Cohen, C., Cornu, C., Baker, R., Gagliardini, E., Papillon, E.**  
559 **and Susini, J. (2017) The ID21 X-ray and infrared microscopy beamline at the**  
560 **ESRF: status and recent applications to artistic materials. *J. Anal. At. Spectrom.*,**  
561 ****32**, 477-493.**

- 562 **Curie, C. and Mari, S.** (2017) New routes for plant iron mining. *New Phytol.*, **214**, 521-  
563 525.
- 564 **Dalton, D.A., Joyner, S.L., Becana, M., Iturbe-Ormaetxe, I. and Chatfield, J.M.**  
565 (1998) Antioxidant defenses in the peripheral cell layers of legume root nodules.  
566 *Plant Physiol.*, **116**, 37-43.
- 567 **Demsar, J., Curk, T., Erjavec, A., Gorup, C., Hocevar, T., Milutinovic, M., Mozina,**  
568 **M., Polajnar, M., Toplak, M., Staric, A., Stajdohar, M., Umek, L., Zagar, L.,**  
569 **Zbontar, J., Zitnik, M. and Zupan, B.** (2013) Orange: Data mining toolbox in  
570 Python. *J. Machine Learning Res.*, **14**, 2349-2353.
- 571 **Downie, J.A.** (2014) Legume nodulation. *Curr. Biol.*, **24**, R184-R190.
- 572 **Durrett, T.P., Gassmann, W. and Rogers, E.E.** (2007) The FRD3-mediated efflux of  
573 citrate into the root vasculature is necessary for efficient iron translocation. *Plant*  
574 *Physiol.*, **144**, 197-205.
- 575 **Escudero, V., Abreu, I., Tejada-Jiménez, M., Rosa-Núñez, E., Quintana, J., Isabel**  
576 **Prieto, R., Larue, C., Wen, J., Villanova, J., Mysore, K.S., Argüello, J.M.,**  
577 **Castillo-Michel, H., Imperial, J. and González-Guerrero, M.** (2019) *Medicago*  
578 *truncatula* Ferroportin2 mediates iron import into nodule symbiosomes. *bioRxiv*,  
579 630699.
- 580 **Finney, L.A. and Halloran, T.V.** (2003) Transition metal speciation in the cell: Insights  
581 from the chemistry of metal ion receptors. *Science*, **300**, 931.
- 582 **Flis, P., Ouerdane, L., Grillet, L., Curie, C., Mari, S. and Lobinski, R.** (2016)  
583 Inventory of metal complexes circulating in plant fluids: a reliable method based  
584 on HPLC coupled with dual elemental and high-resolution molecular mass  
585 spectrometric detection. *New Phytol.*, **211**, 1129-1141.
- 586 **Gage, D.J.** (2002) Analysis of infection thread development using Gfp- and DsRed-  
587 expressing *Sinorhizobium meliloti*. *J. Bacteriol.*, **184**, 7042-7046.
- 588 **Gil-Díez, P., Tejada-Jiménez, M., León-Mediavilla, J., Wen, J., Mysore, K.S.,**  
589 **Imperial, J. and González-Guerrero, M.** (2019) MtMOT1.2 is responsible for  
590 molybdate supply to *Medicago truncatula* nodules. *Plant Cell Environ.*, **42**, 310-  
591 320.
- 592 **González-Guerrero, M., Matthiadis, A., Sáez, Á. and Long, T.A.** (2014) Fixating on  
593 metals: new insights into the role of metals in nodulation and symbiotic nitrogen  
594 fixation. *Front. Plant Sci.*, **5**, 45.
- 595 **González-Guerrero, M., Raimunda, D., Cheng, X. and Argüello, J.M.** (2010) Distinct  
596 functional roles of homologous Cu<sup>+</sup> efflux ATPases in *Pseudomonas aeuginosa*.  
597 *Mol. Microbiol.*, **78**, 1246-1258.
- 598 **González-Guerrero, M., V., E., Sáez, Á. and Tejada-Jiménez, M.** (2016) Transition  
599 metal transport in plants and associated endosymbionts. Arbuscular mycorrhizal  
600 fungi and rhizobia. *Front. Plant Sci.*, **7**, 1088.
- 601 **Hakoyama, T., Niimi, K., Yamamoto, T., Isobe, S., Sato, S., Nakamura, Y., Tabata,**  
602 **S., Kumagai, H., Umehara, Y., Brossuleit, K., Petersen, T.R., Sandal, N.,**  
603 **Stougaard, J., Udvardi, M.K., Tamaoki, M., Kawaguchi, M., Kouchi, H. and**  
604 **Suganuma, N.** (2012) The integral membrane protein SEN1 is required for  
605 symbiotic nitrogen fixation in *Lotus japonicus* nodules. *Plant Cell Physiol.*, **53**,  
606 225-236.
- 607 **Hakoyama, T., Watanabe, H., Tomita, J., Yamamoto, A., Sato, S., Mori, Y., Kouchi,**  
608 **H. and Suganuma, N.** (2009) Nicotianamine synthase specifically expressed in  
609 root nodules of *Lotus japonicus*. *Planta*, **230**, 309-317.

- 610 **Hardy, R.W., Holsten, R.D., Jackson, E.K. and Burns, R.C.** (1968) The acetylene-  
611 ethylene assay for n(2) fixation: laboratory and field evaluation. *Plant Physiol.*,  
612 **43**, 1185-1207.
- 613 **Haydon, M.J., Kawachi, M., Wirtz, M., Hillmer, S., Hell, R. and Krämer, U.** (2012)  
614 Vacuolar nicotianamine has critical and distinct roles under iron deficiency and  
615 for zinc sequestration in Arabidopsis. *Plant Cell*, **24**, 724-737.
- 616 **Higuchi, K., Suzuki, K., Nakanishi, H., Yamaguchi, H., Nishizawa, N.K. and Mori,**  
617 **S.** (1999) Cloning of nicotianamine synthase genes, novel genes involved in the  
618 biosynthesis of phytosiderophores. *Plant Physiol.*, **119**, 471-480.
- 619 **Hoffman, B.M., Lukyanov, D., Yang, Z.Y., Dean, D.R. and Seefeldt, L.C.** (2014)  
620 Mechanism of nitrogen fixation by nitrogenase: The next stage. *Chem. Rev.*, **114**,  
621 4041-4062.
- 622 **Inoue, H., Higuchi, K., Takahashi, M., Nakanishi, H., Mori, S. and Nishizawa, N.K.**  
623 (2003) Three rice nicotianamine synthase genes, OsNAS1, OsNAS2, and  
624 OsNAS3 are expressed in cells involved in long-distance transport of iron and  
625 differentially regulated by iron. *Plant J.*, **36**, 366-381.
- 626 **Inskeep, W.P. and Bloom, P. R.** (1985) Extinction coefficients of chlorophyll a and b  
627 in N,N-dimethylformamide and 80% acetone. *Plant Physiol.*, **77**, 483-485.
- 628 **Jain, A., Wilson, G.T. and Connolly, E.L.** (2014) The diverse roles of FRO family  
629 metalloreductases in iron and copper homeostasis. *Front. Plant Sci.*, **5**, 100.
- 630 **Johnson, S.E. and Mohler, C.L.** (2009) *Crop rotation on organic farms: A planning*  
631 *manual*: National Resource, Agriculture and Engineering Services.
- 632 **Klatte, M., Schuler, M., Wirtz, M., Fink-Straube, C., Hell, R. and Bauer, P.** (2009)  
633 The analysis of Arabidopsis nicotianamine synthase mutants reveals functions for  
634 nicotianamine in seed iron loading and iron deficiency responses. *Plant Physiol.*,  
635 **150**, 257-271.
- 636 **Kobayashi, T. and Nishizawa, N.K.** (2012) Iron uptake, translocation, and regulation in  
637 higher plants. *Annu. Rev. Plant Biol.*, **63**, 131-152.
- 638 **Kondorosi, E., Mergaert, P. and Kereszt, A.** (2013) A paradigm for endosymbiotic life:  
639 Cell differentiation of *Rhizobium* bacteria provoked by host plant factors. *Annu.*  
640 *Rev. Microbiol.*, **67**, 611-628.
- 641 **Kryvoruchko, I.S., Routray, P., Sinharoy, S., Torres-Jerez, I., Tejada-Jiménez, M.,**  
642 **Finney, L.A., Nakashima, J., Pislariu, C.I., Benedito, V.A., González-**  
643 **Guerrero, M., Roberts, D.M. and Udvardi, M.K.** (2018) An iron-activated  
644 citrate transporter, MtMATE67, is required for symbiotic nitrogen fixation. *Plant*  
645 *Physiol.*, **176**, 2315-2329.
- 646 **Kumar, R.K., Chu, H.H., Abundis, C., Vasques, K., Rodriguez, D.C., Chia, J.-C.,**  
647 **Huang, R., Vatamaniuk, O.K. and Walker, E.L.** (2017) Iron-nicotianamine  
648 transporters are required for proper long distance iron signaling. *Plant Physiol.*,  
649 **175**, 1254.
- 650 **Larue, C., Castilo-Michel, H., Sobanska, S., Cécillon, L., Bureau, S., Barthès, V.,**  
651 **Ouerdane, L., Carrière, M. and Sarret, G.** (2014) Foliar exposure of the crop  
652 *Lactuca sativa* to silver nanoparticles: evidence for internalization and changes in  
653 Ag speciation. *J. Hazard. Mater.*, **264**, 98-106.
- 654 **León-Mediavilla, J., Senovilla, M., Montiel, J., Gil-Díez, P., Saez, Á., Kryvoruchko,**  
655 **I.S., Reguera, M., Udvardi, M.K., Imperial, J. and González-Guerrero, M.**  
656 (2018) MtMTP2-facilitated zinc transport into intracellular compartments is  
657 essential for nodule development in *Medicago truncatula*. *Front. Plant Sci.*, **9**,  
658 990.

- 659 **LeVier, K., Day, D.A. and Guerinot, M.L.** (1996) Iron uptake by symbiosomes from  
660 soybean root nodules. *Plant Physiol.*, **111**, 893-900.
- 661 **Montiel, J., Arthikala, M.-K., Cárdenas, L. and Quinto, C.** (2016) Legume NADPH  
662 oxidases have crucial roles at different stages of nodulation. *Int. J. Mol. Sci.*, **17**,  
663 680.
- 664 **Moreau, S., Meyer, J.M. and Puppo, A.** (1995) Uptake of iron by symbiosomes and  
665 bacteroids from soybean nodules. *FEBS Lett.*, **361**, 225-228.
- 666 **Mus, F., Crook, M.B., Garcia, K., Garcia Costas, A., Geddes, B.A., Kouri, E.D.,**  
667 **Paramasivan, P., Ryu, M.H., Oldroyd, G.E., Poole, P.S., Udvardi, M.K.,**  
668 **Voigt, C.A., Ane, J.M. and Peters, J.W.** (2016) Symbiotic nitrogen fixation and  
669 challenges to extending it to non-legumes. *Appl. Environ. Microbiol.*, **82**, 3698-  
670 3710.
- 671 **Nakagawa, T., Kurose, T., Hino, T., Tanaka, K., Kawamukai, M., Niwa, Y.,**  
672 **Toyooka, K., Matsuoka, K., Jinbo, T. and Kimura, T.** (2007) Development of  
673 series of gateway binary vectors, pGWBs, for realizing efficient construction of  
674 fusion genes for plant transformation. *J. Biosci. Bioeng.*, **104**, 34-41.
- 675 **O'Hara, G.W.** (2001) Nutritional constraints on root nodule bacteria affecting symbiotic  
676 nitrogen fixation: a review. *Aust. J. Exp. Agr.*, **41**, 417-433.
- 677 **Oldroyd, G.E.D.** (2013) Speak, friend, and enter: signalling systems that promote  
678 beneficial symbiotic associations in plants. *Nat. Rev. Micro.*, **11**, 252-263.
- 679 **Preisig, O., Zufferey, R., Thony-Meyer, L., Appleby, C. and Hennecke, H.** (1996) A  
680 high-affinity *cbb3*-type cytochrome oxidase terminates the symbiosis- specific  
681 respiratory chain of *Bradyrhizobium japonicum*. *J. Bacteriol.*, **178**, 1532-1538.
- 682 **Ravel, B. and Newville, M.** (2005) ATHENA, ARTEMIS, HEPHAESTUS: data  
683 analysis for X-ray absorption spectroscopy using IFEFFIT. *J. Synchrotron*  
684 *Radiat.*, **12**, 537-541.
- 685 **Rellán-Álvarez, R., Abadía, J. and Álvarez-Fernández, A.** (2008) Formation of metal-  
686 nicotianamine complexes as affected by pH, ligand exchange with citrate and  
687 metal exchange. A study by electrospray ionization time-of-flight mass  
688 spectrometry. *Rapid Commun. Mass Spectrom.*, **22**, 1553-1562.
- 689 **Rellán-Álvarez, R., Giner-Martínez-Sierra, J., Orduna, J., Orera, I., Rodríguez-**  
690 **Castrillón, J.Á., García-Alonso, J.I., Abadía, J. and Álvarez-Fernández, A.**  
691 (2010) Identification of a tri-iron(III), tri-citrate complex in the xylem sap of iron-  
692 deficient tomato resupplied with iron: New insights into plant iron long-distance  
693 transport. *Plant Cell Physiol.*, **51**, 91-102.
- 694 **Rodríguez-Haas, B., Finney, L., Vogt, S., González-Melendi, P., Imperial, J. and**  
695 **González-Guerrero, M.** (2013) Iron distribution through the developmental  
696 stages of *Medicago truncatula* nodules. *Metallomics*, **5**, 1247-1253.
- 697 **Roschzttardtz, H., Séguéla-Arnaud, M., Briat, J.-F., Vert, G. and Curie, C.** (2011)  
698 The FRD3 citrate effluxer promotes iron nutrition between symplastically  
699 disconnected tissues throughout Arabidopsis development. *Plant Cell*, **23**, 2725-  
700 2737.
- 701 **Roth, L.E. and Stacey, G.** (1989) Bacterium release into host cells of nitrogen-fixing  
702 soybean nodules: The symbiosome membrane comes from three sources. *Eur. J.*  
703 *Cell Biol.*, **49**, 13-23.
- 704 **Roux, B., Rodde, N., Jardinaud, M.-F., Timmers, T., Sauviac, L., Cottret, L.,**  
705 **Carrère, S., Sallet, E., Courcelle, E., Moreau, S., Debellé, F., Capela, D., de**  
706 **Carvalho-Niebel, F., Gouzy, J., Bruand, C. and Gamas, P.** (2014) An  
707 integrated analysis of plant and bacterial gene expression in symbiotic root

- 708 nodules using laser-capture microdissection coupled to RNA sequencing. *Plant*  
709 *J.*, **77**, 817-837.
- 710 **Rubio, L.M. and Ludden, P.W.** (2005) Maturation of nitrogenase: a biochemical puzzle.  
711 *J. Bacteriol.*, **187**, 405-414.
- 712 **Rubio, M.C., Becana, M., Sato, S., James, E.K., Tabata, S. and Spaink, H.P.** (2007)  
713 Characterization of genomic clones and expression analysis of the three types of  
714 superoxide dismutases during nodule development in *Lotus japonicus*. *Mol. Plant*  
715 *Microbe Interact.*, **20**, 262-275.
- 716 **Santos, R., Hérouart, D., Puppo, A. and Touati, D.** (2000) Critical protective role of  
717 bacterial superoxide dismutase in Rhizobium-legume symbiosis. *Molecular*  
718 *Microbiology*, **38**, 750-759.
- 719 **Schneider, S., Schintlmeister, A., Becana, M., Wagner, M., Woebken, D. and**  
720 **Wienkoop, S.** (2019) Sulfate is transported at significant rates through the  
721 symbiosome membrane and is crucial for nitrogenase biosynthesis. *Plant Cell*  
722 *Environ.*, **42**, 1180-1189.
- 723 **Schuler, M., Rellán-Álvarez, R., Fink-Straube, C., Abadía, J. and Bauer, P.** (2012)  
724 Nicotianamine functions in the phloem-based transport of iron to sink organs, in  
725 pollen development and pollen tube growth in Arabidopsis. *Plant Cell*, **24**, 2380-  
726 2400.
- 727 **Senovilla, M., Castro-Rodríguez, R., Abreu, I., Escudero, V., Kryvoruchko, I.,**  
728 **Udvardi, M.K., Imperial, J. and González-Guerrero, M.** (2018) *Medicago*  
729 *truncatula* Copper Transporter1 (MtCOPT1) delivers copper for symbiotic  
730 nitrogen fixation. *New Phytol.*, **218**, 696-709.
- 731 **Singleton, P.W. and van Kessel, C.** (1987) Effect of localized nitrogen availability to  
732 soybean half-root systems on photosynthate partitioning to roots and nodules.  
733 *Plant Physiology*, **83**, 552.
- 734 **Smil, V.** (1999) Nitrogen in crop production: an account of global flows. *Global*  
735 *Biogeochem. Cycles*, **13**, 647-662.
- 736 **Solé, V.A., Papillon, E., Cotte, M., Walter, P. and Susini, J.A.** (2007) A multiplatform  
737 code for the analysis of energy-dispersive X-ray fluorescence spectra.  
738 *Spectrochim. Acta B*, **62**, 63-68
- 739 **Streeter, J.G.** (1987) Carbohydrate, organic acid, and amino acid composition of  
740 bacteroids and cytosol from soybean nodules. *Plant Physiol.*, **85**, 768-773.
- 741 **Takanashi, K., Yokosho, K., Saeki, K., Sugiyama, A., Sato, S., Tabata, S., Ma, J.F.**  
742 **and Yazaki, K.** (2013) LjMATE1: a citrate transporter responsible for iron supply  
743 to the nodule infection zone of *Lotus japonicus*. *Plant Cell Physiol.*, **54**, 585-594.
- 744 **Tang, C., Robson, A.D. and Dilworth, M.J.** (1991) Which stage of nodule initiation in  
745 *Lupinus angustifolius* L. is sensitive to iron deficiency? *New Phytol.*, **117**, 243-  
746 250.
- 747 **Tejada-Jiménez, M., Castro-Rodríguez, R., Kryvoruchko, I., Lucas, M.M., Udvardi,**  
748 **M., Imperial, J. and González-Guerrero, M.** (2015) *Medicago truncatula*  
749 Natural Resistance-Associated Macrophage Protein1 is required for iron uptake  
750 by rhizobia-infected nodule cells. *Plant Physiol.*, **168**, 258-272.
- 751 **Tejada-Jiménez, M., Gil-Diez, P., Leon-Mediavilla, J., Wen, J., Mysore, K.S.,**  
752 **Imperial, J. and Gonzalez-Guerrero, M.** (2017) *Medicago truncatula*  
753 molybdate transporter type 1 (MOT1.3) is a plasma membrane molybdenum  
754 transporter required for nitrogenase activity in root nodules under molybdenum  
755 deficiency. *New Phytol.*, **216**, 1223-1235.

- 756 **Terry, R.E., Soerensen, K.U., Jolley, V.D. and Brown, J.C.** (1991) The role of active  
757 *Bradyrhizobium japonicum* in iron stress response of soy-beans. *Plant Soil*, **130**,  
758 225-230.
- 759 **Udvardi, M. and Poole, P.S.** (2013) Transport and metabolism in legume-rhizobia  
760 symbioses. *Annu. Rev. Plant Biol.*, **64**, 781-805.
- 761 **Valentine, A.J., Kleinert, A. and Benedito, V.A.** (2017) Adaptive strategies for nitrogen  
762 metabolism in phosphate deficient legume nodules. *Plant Science*, **256**, 46-52.
- 763 **Vasse, J., de Billy, F., Camut, S. and Truchet, G.** (1990) Correlation between  
764 ultrastructural differentiation of bacteroids and nitrogen fixation in alfalfa  
765 nodules. *J. Bacteriol.*, **172**, 4295-4306.
- 766 **Vernoud, V., Journet, E.P. and Barker, D.G.** (1999) *MtENOD20*, a Nod factor-  
767 inducible molecular marker for root cortical cell activation. *Mol. Plant Microbe*  
768 *Interact.*, **12**, 604-614.
- 769 **von Wiren, N., Klair, S., Bansal, S., Briat, J.-F., Khodr, H., Shioiri, T., Leigh, R.A.**  
770 **and Hider, R.C.** (1999) Nicotianamine chelates both FeIII and FeII. Implications  
771 for metal transport in plants. *Plant Physiol.*, **119**, 1107-1114.
- 772 **Waters, B.M., Chu, H.-H., DiDonato, R.J., Roberts, L.A., Eisley, R.B., Lahner, B.,**  
773 **Salt, D.E. and Walker, E.L.** (2006) Mutations in *Arabidopsis Yellow Stripe-*  
774 *Like1* and *Yellow Stripe-Like3* reveal their roles in metal ion homeostasis and  
775 loading of metal ions in seeds. *Plant Physiol.*, **141**, 1446-1458.
- 776 **Xiao, T.T., Schilderink, S., Moling, S., Deinum, E.E., Kondorosi, E., Franssen, H.,**  
777 **Kulikova, O., Niebel, A. and Bisseling, T.** (2014) Fate map of *Medicago*  
778 *truncatula* root nodules. *Development*, **141**, 3517-3528.
- 779
- 780
- 781
- 782
- 783
- 784
- 785
- 786
- 787
- 788
- 789
- 790
- 791
- 792

793 **Table 1:** Iron speciation (%) in WT and *nas2-1* nodules. n.d. = not detected.

| Region  | WT           |                |               |                | <i>nas2-1</i> |                |               |                |
|---------|--------------|----------------|---------------|----------------|---------------|----------------|---------------|----------------|
|         | Fe(II)-<br>S | Fe(II)-<br>O/N | Fe(III)-<br>O | R <sup>2</sup> | Fe(II)-<br>S  | Fe(II)-<br>O/N | Fe(III)-<br>O | R <sup>2</sup> |
| ZII     | 4            | 12             | 83            | 0.0004         | n.d.          | 14             | 86            | 0.0008         |
| IZ      | 13           | 19             | 69            | 0.0004         | 5             | 17             | 78            | 0.0006         |
| ZIII    | 50           | 24             | 27            | 0.001          | 14            | 49             | 37            | 0.0005         |
| Vessels | n.d.         | 22             | 79            | 0.0008         | n.d.          | 22             | 78            | 0.001          |

794

795

796

797

798

799

800

801

802

803

804

805

806

807

808

809

810

811

812

813

814

815

## 816 FIGURE LEGENDS

817 **Figure 1.** *MtNAS2* is expressed in roots and nodules of *M. truncatula*. (A) Expression  
818 data was normalized to the expression of ubiquitin conjugating enzyme E2 gene  
819 (*Medtr7g116940*) as standard. Data are the mean  $\pm$  SE of three independent experiments  
820 with 4 pooled plants. (B) *Tnt1* insertion in the only exon of *MtNAS2* causes loss of  
821 *MtNAS2* transcripts. Expression was determined in 28 dpi roots and nodules of wild-type  
822 (WT) and *nas2-1* plants. Data was relativized to the expression of ubiquitin conjugating  
823 enzyme E2 (*Medtr7g116940*) and expressed as mean  $\pm$  SE of three independent  
824 experiments with 4 pooled plants.

825 **Figure 2.** *MtNAS2* is required for nitrogen fixation. (A) Growth of representative wild-  
826 type (WT), *nas2-1*, and *nas2-1* plants transformed with *MtNAS2* controlled by its own  
827 promoter (*nas2-1 MtNAS2*). Bar = 1.5 cm. (B) Fresh weight of WT, *nas2-1*, and *nas2-1*  
828 *MtNAS2* plants. Data are the mean  $\pm$  SE of at least 9 transformed plants. (C) Detail of  
829 representative nodules of WT, *nas2-1*, and *nas2-1 MtNAS2* plants. Bars = 500  $\mu$ m. (D)  
830 Number of nodules in 28 dpi WT, *nas2-1*, and *nas2-1 MtNAS2* plants. Data are the mean  
831  $\pm$  SE of at least 9 transformed plants. (E) Nitrogenase activity in 28 dpi nodules from WT,  
832 *nas2-1*, and *nas2-1 MtNAS2* plants. Acetylene reduction was measured in duplicate from  
833 three sets of three-four pooled plants. Data are the mean  $\pm$  SE. \* indicates statistically  
834 significant differences ( $p < 0.05$ ).

835 **Figure 3.** *MtNAS2* is not required for plant growth under non-symbiotic conditions. (A)  
836 Growth of representative wild-type (WT) and *nas2-1* plants when watered with a nutrient  
837 solution supplemented with ammonium nitrate and not inoculated with *S. meliloti*. Bar =  
838 1.5 cm. (B) Fresh weight of WT and *nas2-1* plants. Data are the mean  $\pm$  SE of at least 5  
839 plants. (C) Chlorophyll concentration of wild-type and *nas2-1* plants. Data are the mean  
840  $\pm$  SE of two sets of 5 pooled plants.

841 **Figure 4.** *MtNAS2* is expressed in the root vasculature and in the interzone, zone III, and  
842 vessels in nodules. (A) GUS staining of 28 dpi *M. truncatula* roots and nodules expressing  
843 the *gus* gene under the control of *MtNAS2* promoter region. Bar = 200  $\mu$ m. (B)  
844 Longitudinal section of a GUS-stained 28 dpi *M. truncatula* nodule expressing the *gus*  
845 gene under the control of *MtNAS2* promoter region. ZI indicates Zone I; ZII, Zone II; IZ,  
846 Interzone; and ZIII, Zone III. Bar = 200  $\mu$ m. (C) Cross section of a GUS-stained 28 dpi  
847 *M. truncatula* nodule expressing the *gus* gene under the control of *MtNAS2* promoter



848 region. Bar = 200  $\mu\text{m}$ . (D) Cross section of a GUS-stained 28 dpi *M. truncatula* root  
849 expressing the *gus* gene under the control of *MtNAS2* promoter region. Bar = 50  $\mu\text{m}$ .

850 **Figure 5.** *MtNAS2* is located in the nodule core cells, in the endodermis of the nodule  
851 vessels, and in cells surrounding the xylem in the root vasculature. (A) Longitudinal  
852 section of a 28 dpi *M. truncatula* nodule expressing *MtNAS2-HA* under its own promoter.  
853 The three C-terminal HA epitopes were detected using an Alexa594-conjugated antibody  
854 (red, left panel). Transformed plants were inoculated with a GFP-expressing *S. meliloti*  
855 (green, middle panel). Both images were overlaid with the transillumination image (right  
856 panel). ZI indicates Zone I; ZII, Zone II; IZ, Interzone; and ZIII, Zone III. Bars = 100  $\mu\text{m}$ .  
857 (B) Detail of the zone III of a 28 dpi *M. truncatula* nodule expressing *MtNAS2-HA* under  
858 its own promoter. Left panel corresponds to the Alexa594 signal used to detect the HA-  
859 tag, middle panel corresponds to the GFP channel showing *S. meliloti*, and the two were  
860 overlaid with the bright field channel in the right panel. Bars = 50  $\mu\text{m}$  (C) Cross section  
861 of a nodule vessel from a 28 dpi *M. truncatula* nodule expressing *MtNAS2-HA* under its  
862 own promoter. Left panel corresponds to the Alexa594 signal used to detect the HA-tag,  
863 middle panel corresponds to the bright field channel showing *S. meliloti*, and the two were  
864 overlaid in the right panel. Bars = 50  $\mu\text{m}$ . (D) Cross section from a 28 dpi *M. truncatula*  
865 root expressing *MtNAS2-HA* under its own promoter. Left panel corresponds to the  
866 Alexa594 signal used to detect the HA-tag, middle panel corresponds to autofluorescence  
867 signal of xylem, and the two were overlaid with the bright field channel in the right panel.  
868 Bars = 100  $\mu\text{m}$ .

869 **Figure 6.** *MtNAS2* is required for iron distribution and speciation in nodules. (A) Iron  
870 (left panel), copper (middle panel), and zinc (right panel) concentration in shoots, roots,  
871 and nodules from 28 dpi wild-type (WT) and *nas2-1* plants. Data are the mean  $\pm$  SE of  
872 three sets of three-four pooled organs. (B) Synchrotron-based X-ray fluorescence images  
873 of WT (left panels) or *nas2-1* (right panels) showing calcium (top panels) or iron (center  
874 panels) distribution in 28 dpi nodules. Lower panels are the overlaid iron and calcium  
875 distribution (iron is indicated in red and calcium in green). ZI indicates Zone I; ZII, Zone  
876 II; IZ, Interzone; and ZIII, Zone III. Bars = 100  $\mu\text{m}$ . (C) XANES spectra obtained from  
877 different regions of WT and *nas2-1* nodules. (D) Decomposition of the Zone III signal  
878 into its two principal components.

## FIGURE 1

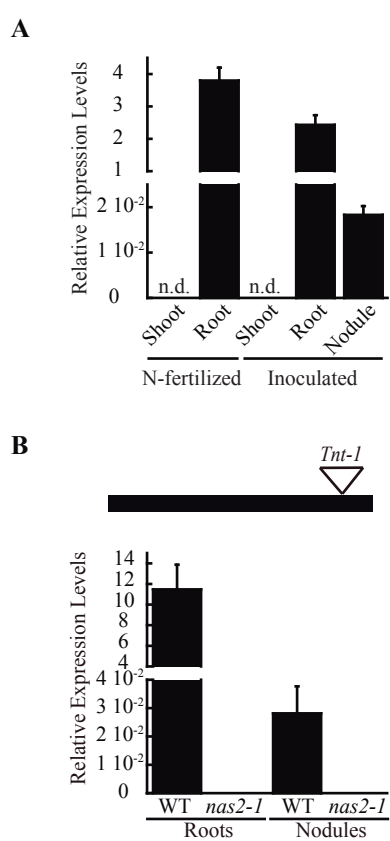

**FIGURE 2**

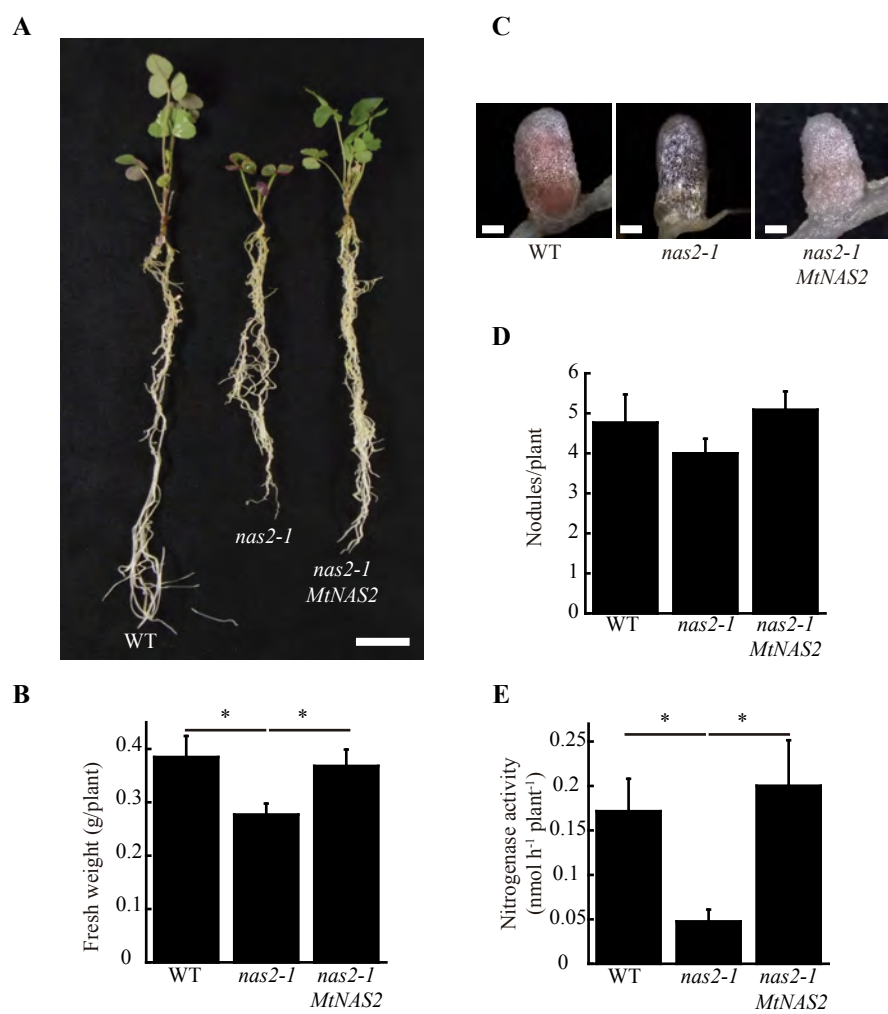

**FIGURE 3**

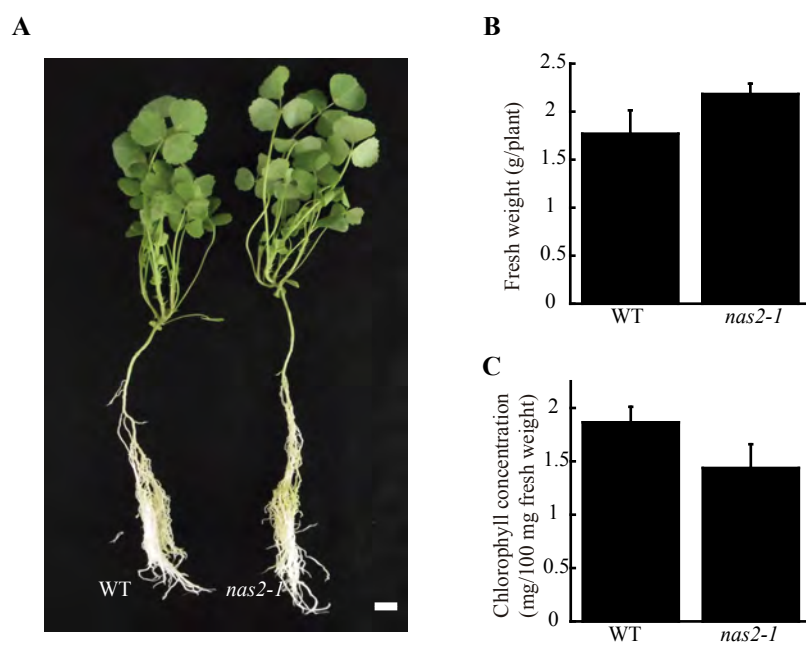

**FIGURE 4**

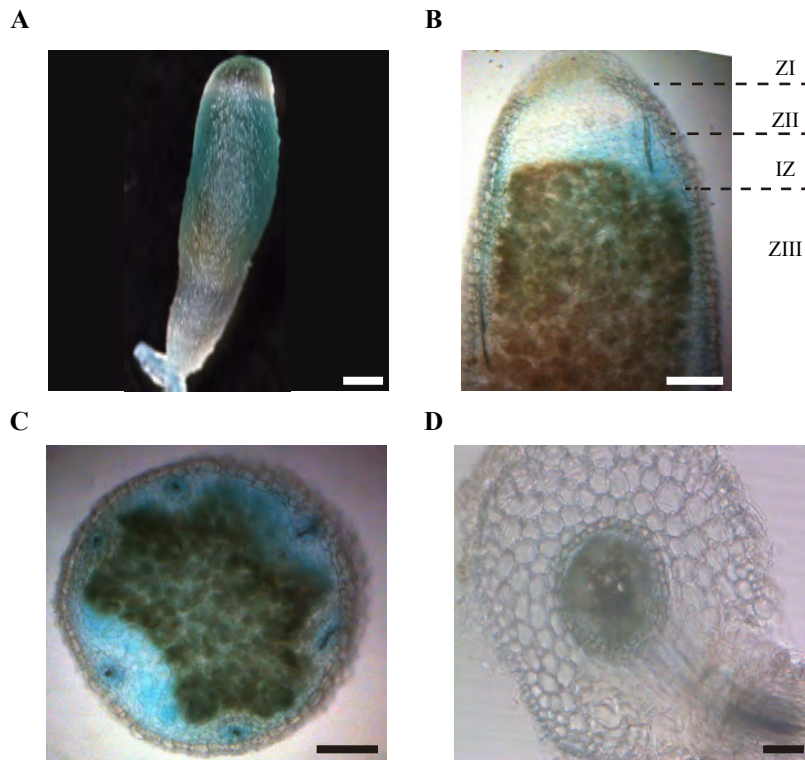

**FIGURE 5**

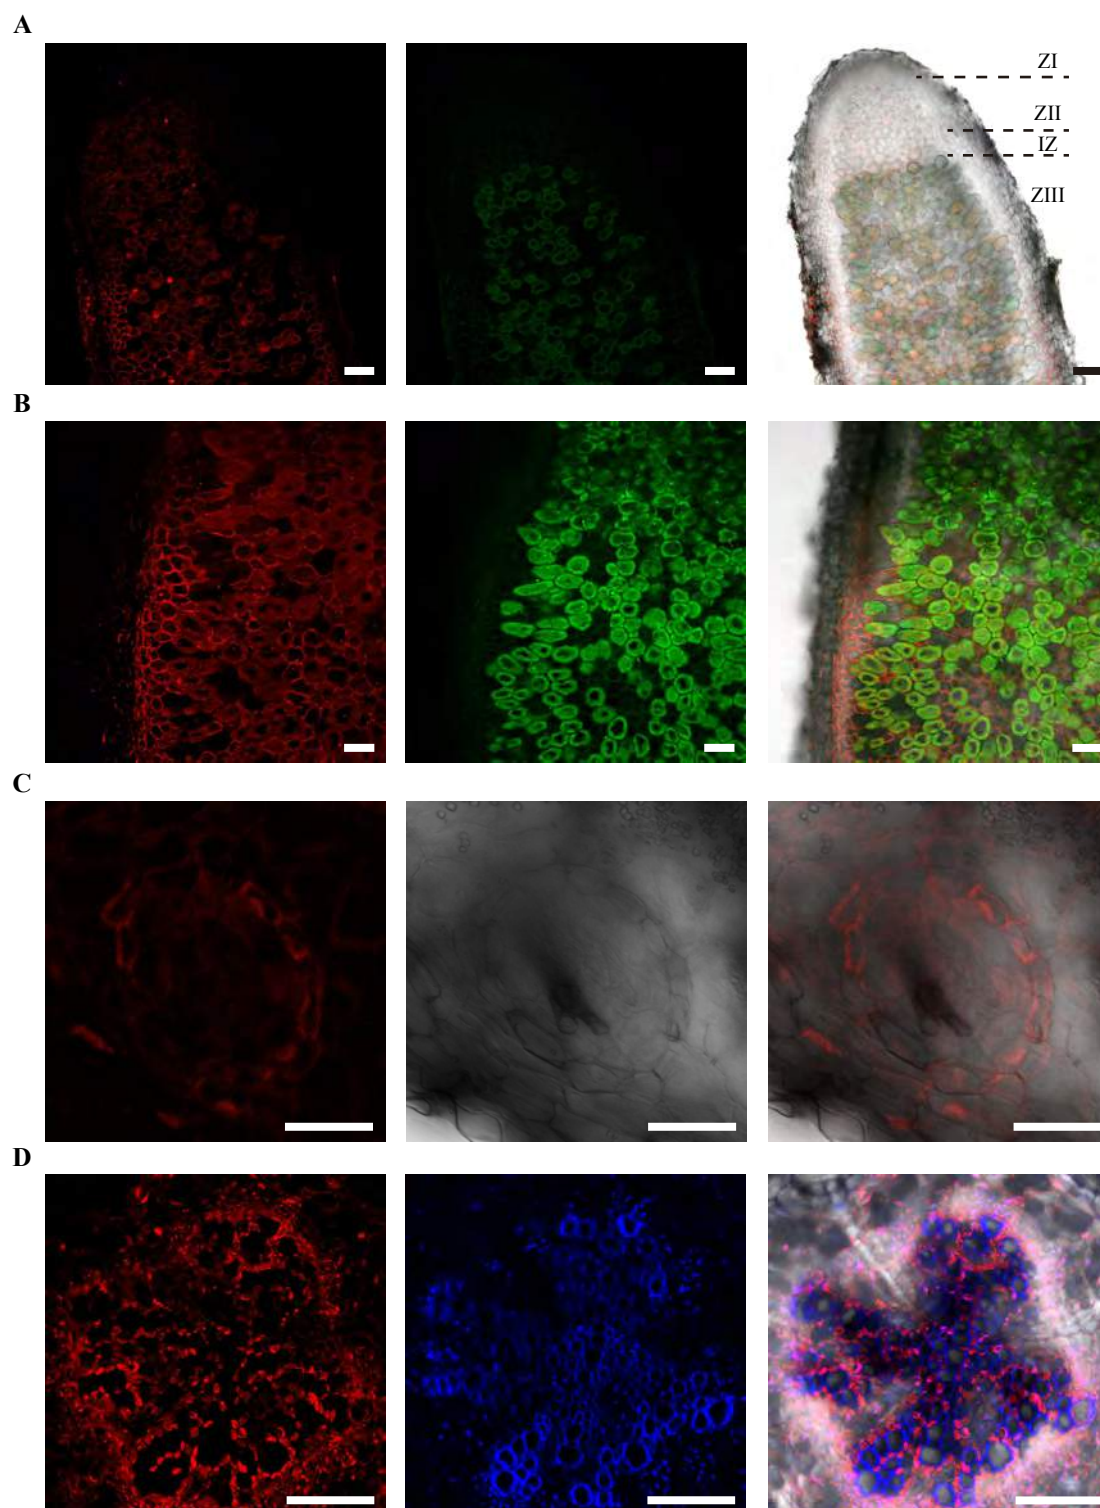

**FIGURE 6**

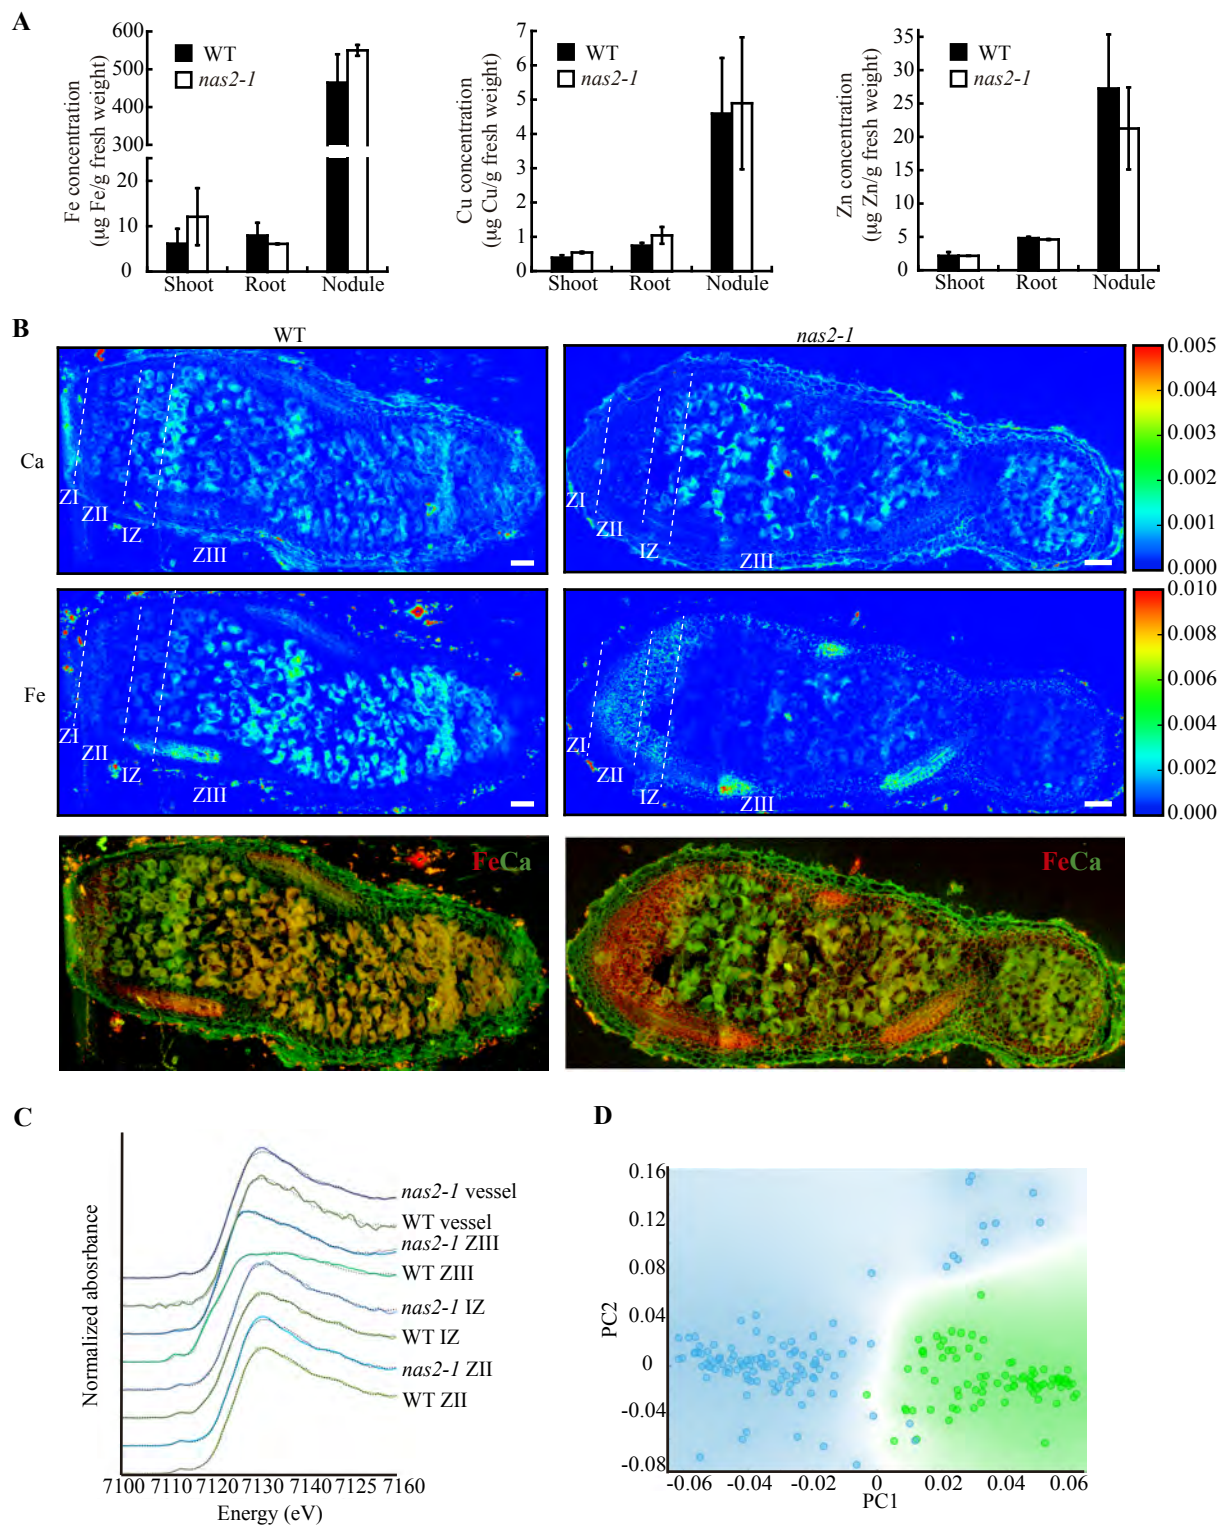

Source: https://www.biorxiv.org/content/10.1101/717983v1.full.pdf
